# Supplementary material for: Projection of Groundwater Level Fluctuations Using Different Machine Learning Algorithms under Climate Change in the Mashhad Aquifer, Iran
Source: Research Square preprint supplement (doi:10.21203/rs.3.rs-2319553/v1), 2022-12-03
Supplement: Supplementary file 1 [file 4ba9fec307f80765730405ca.docx]

**Projection of Groundwater Level Fluctuations Using Different Machine Learning Algorithms under Climate Change in the Mashhad Aquifer, Iran**

Ghasem Panahi1, Mahya Hassanzadeh Eskafi2*, Alireza Faridhosseini3, Saeed Reza Khodashenas4, Abbas Rohani5

*1 Ph.D. student of Water Science and Engineering Department, Agriculture Faculty, Ferdowsi University of Mashhad (FUM), Mashhad, Iran. ghasempanahi71@mail.um.ac.ir*

*2 Master in Water Science and Engineering, Water Science and Engineering Department, Agriculture Faculty, Ferdowsi University of Mashhad (FUM), Mashhad, Iran. mahya.eskafi@mail.um.ac.ir*

*3 Associate Professor of Water Science and Engineering Department, Agriculture Faculty, Ferdowsi University of Mashhad (FUM), Mashhad, Iran. farid-h@ferdowsi.um.ac.ir*

*4 Professor of Water Science and Engineering Department, Agriculture Faculty, Ferdowsi University of Mashhad (FUM), Mashhad, Iran. khodashenas@ferdowsi.um.ac.ir*

*5 Associate Professor of Biosystems Engineering, Agriculture Faculty, Ferdowsi University of Mashhad (FUM), Mashhad, Iran. arohani@um.ac.ir*

Highlights

•The CMhyd model was used to extract climatic variables from ACCESS-CM2 model.

• Temperatures and evaporation will increase, and rainfall will decrease.

• RBF model was an excellent performance in predicting GWL.

• The GWL will decrease by 6.60 meters under the SSP5-8.5 scenario in the Mashhad aquifer.
